# Supplementary material
Source: PubMed Central journal article supplement (PMC6697621)
Supplement: NIHMS1530135-supplement-1.pdf [file NIHMS1530135-supplement-1.pdf]

**SUPPLEMENTARY MATERIALS**

**A Phase I Dose Escalation Trial of BN-CV301, a Recombinant Poxviral Vaccine Targeting MUC1 and CEA with Costimulatory Molecules, by Gatti-Mays et al.**

- Supplementary Table S1A:** Phenotypic analysis of surface markers on human DCs transfected with MVA-BN-CV301 and FPV-CV301 vectors
- Supplementary Table S1B:** Activation of CEA- and MUC1-specific T-cells by MVA-BN-CV301 and FPV-CV301
- Supplementary Table S2:** Number of patients reporting adverse events possibly, probably or definitely attributed to CV301 (n=202 events in total)
- Supplementary Table S3:** Development of CEA- and MUC1-specific T-cells by BN-CV301
- Supplementary Figure S1:** KRAS specific responses assessed in 3 patients pre- and post-BN-CV301 vaccine

**Supplementary Table S1A.** Phenotypic analysis of surface markers on human DCs transfected with MVA-BN- CV301 and FPV-CV301 vectors

| Vectors      | MOI | CD58             | CD54              | CD80             | CEA              | MUC1             |
|--------------|-----|------------------|-------------------|------------------|------------------|------------------|
| MVA-BN-CV301 | 5   | 99.7<br>(35,949) | 98.8<br>(106,201) | 72.7<br>(48,692) | 48.7<br>(23,318) | 39.0<br>(17,973) |
| MVA-WT       | 10  | 99.6<br>(8,547)  | 98.1<br>(38,778)  | 4.9<br>(79,602)  | 0.25<br>(63,054) | 2.6<br>(33,325)  |
| FPV-CV301    | 20  | 98.9<br>(12,227) | 100<br>(125,668)  | 42.8<br>(23,052) | 59.2<br>(19,614) | 37.5<br>(7,422)  |
| FPV-WT       | 40  | 99.7<br>(7,177)  | 99.9<br>(51,133)  | 10.5<br>(12,794) | 5.9<br>(559)     | 7.3<br>(14,879)  |
| DC only      | 0   | 99.9<br>(19,429) | 99.8<br>(55,705)  | 7.6<br>(68,616)  | 0.7<br>(38,890)  | 4.49<br>(53,000) |

Dendritic cells (DC) were generated from an HLA-A2 donor.  
MOI, multiplicity of infection

**Supplementary Table S1B.** Activation of CEA- and MUC1-specific T-cells by MVA-BN-CV301 and FPV-CV301

| Vectors      | IFN- $\gamma$ (pg/ml) |       |        |          |
|--------------|-----------------------|-------|--------|----------|
|              | MOI                   | T-CEA | T-MUC1 | T-MUC1-C |
| MVA-BN-CV301 | 5                     | 3,698 | 2,363  | 3,792    |
| MVA-WT       | 5                     | < 2   | < 2    | < 2      |
| FPV-CV301    | 20                    | 2,604 | 5,287  | 3,515    |
| FPV-WT       | 20                    | < 2   | < 2    | < 2      |

Dendritic cells only 1.65 pg/ml of IFN- $\gamma$ .

APC: T-cells = 1:10 ( $2 \times 10^4$  :  $2 \times 10^5$ ). Results are expressed in pg/ml of IFN- $\gamma$ .

MOI, multiplicity of infection

T-CEA, carcinoembryonic antigen-specific T-cells

T-MUC1, mucin-1-specific T-cells

T-MUC1-C, C-terminus of MUC1-specific T-cells

**Supplementary Table S2.** Number of patients reporting adverse events possibly, probably or definitely attributed to CV301 (n=202 events in total)\*

| <b>Drug Related Adverse Events</b>                   | <b>Grade 1-2</b> | <b>Grade 3-5</b> |
|------------------------------------------------------|------------------|------------------|
| Gastrointestinal Disorders                           | 1 (8.3%)         | -(-)             |
| Nausea                                               | 1 (8.3%)         | -(-)             |
| Vomiting                                             | 1 (8.3%)         | -(-)             |
| General Disorders and Administration Site Conditions | 12 (100%)        | -(-)             |
| Chills                                               | 7 (58.3%)        | -(-)             |
| Fatigue                                              | 11 (91.7%)       | -(-)             |
| Injection Site Erythema                              | 12 (100%)        | -(-)             |
| Injection Site Induration                            | 10 (83.3%)       | -(-)             |
| Injection Site Pain                                  | 10 (83.3%)       | -(-)             |
| Injection Site Puritis                               | 7 (58.3%)        | -(-)             |
| Injection Site Swelling                              | 12 (100%)        | -(-)             |
| Pyrexia                                              | 7 (58.3%)        | -(-)             |
| Investigations                                       | 6 (50.0%)        | -(-)             |
| Body temperature increased                           | 6 (50.0%)        | -(-)             |
| Musculoskeletal and Connective Tissue Disorders      | 9 (75.0%)        | -(-)             |
| Arthralgia                                           | 1 (8.3%)         | -(-)             |
| Myalgia                                              | 9 (75.0%)        | -(-)             |
| Nervous System Disorders                             | 6 (50.0%)        | -(-)             |
| Headache                                             | 6 (50.0%)        | -(-)             |

N (%) unless otherwise stated.

Some adverse events were reported more than once by a single patient.

\* One patient reported grade 3 UTI/hematuria but it was determined unlikely to be due to CV301. No other grade 3 or higher adverse events were reported.

**Supplementary Table S3.** Development of CEA and MUC1-specific T-cells by BN-CV301**A**

| PT | CEA IFN $\gamma$ in CD8 |        |             |
|----|-------------------------|--------|-------------|
|    | Pre                     | Week 6 | Week 10     |
| 1  | 0                       | 0      | 0           |
| 2  | 0                       | 0      | <b>2256</b> |
| 6  | 514                     | 705    | <b>954</b>  |
| 8  | 0                       | 0      | 0           |
| 10 | 743                     | 743    | 19          |
| 11 | 2380                    | 0      | <b>3609</b> |
| 12 | 0                       | 0      | <b>949</b>  |

**B**

| PT | CEA IFN $\gamma$ in CD4 |             |              |
|----|-------------------------|-------------|--------------|
|    | Pre                     | Week 6      | Week 10      |
| 1  | 1908                    | 1908        | 814          |
| 2  | 0                       | 0           | <b>1422</b>  |
| 6  | 0                       | <b>3013</b> | <b>3727</b>  |
| 8  | 0                       | <b>7105</b> | <b>10031</b> |
| 10 | 655                     | 683         | <b>1074</b>  |
| 11 | 0                       | 0           | <b>797</b>   |
| 12 | 528                     | 353         | 535          |

**C**

| PT | MUC1 IFN $\gamma$ in CD4 |              |             |
|----|--------------------------|--------------|-------------|
|    | Pre                      | Week 6       | Week 10     |
| 1  | 0                        | 0            | 0           |
| 2  | 0                        | 0            | <b>3863</b> |
| 6  | 997                      | <b>1342</b>  | 1167        |
| 8  | 7402                     | <b>12055</b> | 7402        |
| 10 | 0                        | <b>686</b>   | 0           |
| 11 | 0                        | <b>2003</b>  | <b>2600</b> |
| 12 | 88                       | <b>564</b>   | 205         |

**D**

| PT | CEA CD107a in CD8 |             |             |
|----|-------------------|-------------|-------------|
|    | Pre               | Week 6      | Week 10     |
| 1  | 0                 | 0           | 0           |
| 2  | 0                 | 0           | <b>1837</b> |
| 6  | 0                 | <b>3161</b> | <b>4133</b> |
| 8  | 1082              | <b>1807</b> | 0           |
| 10 | 0                 | 45          | <b>3084</b> |
| 11 | 5141              | 0           | 2532        |
| 12 | 978               | 0           | <b>2638</b> |

CEA and MUC1-specific responses were compared in 7 patients prior to vaccination and at both 6 weeks (2 weeks after the 2<sup>nd</sup> MVA-BN-CV301 prime) and 10 weeks (2 weeks after the 1<sup>st</sup> FPV-CV301 boost). Data shown are (A) CEA-specific CD8<sup>+</sup> T-cells producing IFN $\gamma$ , (B) CEA-specific CD4<sup>+</sup> T-cells producing IFN $\gamma$ , (C) MUC1-specific CD4<sup>+</sup> T-cells producing IFN $\gamma$ , and (D) CEA-specific CD8<sup>+</sup> cells positive for CD107a. Values in tables are the absolute number of CD4<sup>+</sup> or CD8<sup>+</sup> T-cells producing IFN $\gamma$  or positive for the degranulation marker CD107a per  $1 \times 10^6$  PBMC plated at the start of the stimulation assay, following subtraction of any background signal (obtained with the HLA peptide pool). Numbers in bold are those positive post- versus pre-vaccination (i.e. >250 CD4<sup>+</sup> or CD8<sup>+</sup> T-cells producing cytokine and/or positive for CD107a after subtraction of any pre-existing signal).

**Supplementary Figure S1.** KRAS specific responses assessed in 3 patients pre- and post-BN-CV301 vaccine

| Patient # | Cancer Type | Dose Level | KRAS Type | Weeks on Trial (Best Response) | Tested at:       |
|-----------|-------------|------------|-----------|--------------------------------|------------------|
| 7         | Appendiceal | 3          | G12C MT   | 6 (PD)                         | Pre, 43          |
| 10        | Colon       | 3          | G12D MT   | 82+ (PR)                       | Pre, 43, 71, 126 |
| 11        | Appendiceal | 3          | G12D MT   | 81+ (SD)                       | Pre, 42, 70, 153 |

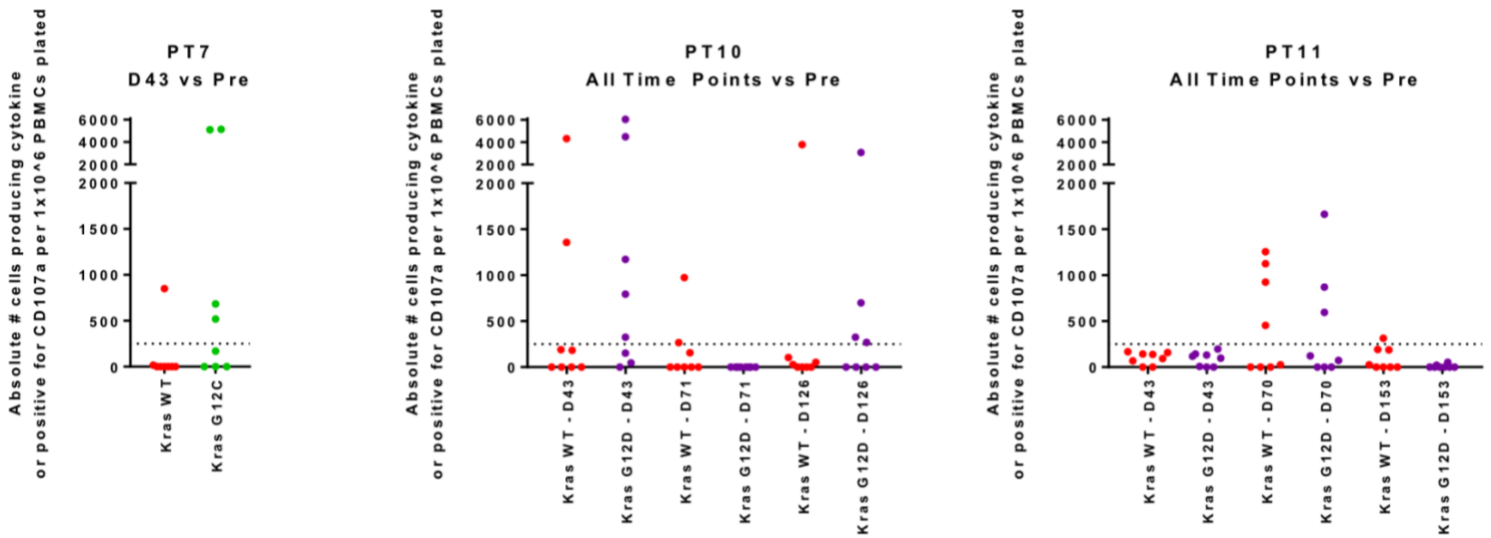

T-cell responses to KRAS mutations were compared to KRAS wildtype in 3 patients where the specific mutation was known and peptides could be designed (2 patients with KRAS G12D mutation, 1 patient with KRAS G12C mutation). There was a slightly greater response to the specific KRAS mutations than the wildtype peptides in 2 of the 3 patients (Patients 7 and 10). MT, mutant
